# Supplementary material for: Hybrid Polymer–Surfactant Wormlike Micelles for Concurrent Use for Oil Recovery and Drag Reduction
Source: MDPI journal article supplement (doi:10.3390/polym15234615), 2023-12-04
Supplement: s1 [file s1]

# Hybrid Polymer–Surfactant Wormlike Micelles for Concurrent Use for Oil Recovery and Drag Reduction

Alexander L. Kwiatkowski <sup>1,\*</sup>, Vyacheslav S. Molchanov <sup>1</sup>, Yuri M. Chesnokov <sup>2</sup>, Oleksandr I. Ivankov <sup>3</sup> and Olga E. Philippova <sup>1</sup>

<sup>1</sup> Faculty of Physics, Lomonosov Moscow State University, 119991 Moscow, Russia; molchan@polly.phys.msu.ru (V.S.M.); phil@polly.phys.msu.ru (O.E.P.)

<sup>2</sup> National Research Center, Kurchatov Institute, 123182 Moscow, Russia; chessyura@yandex.ru

<sup>3</sup> Joint Institute for Nuclear Research, 141980 Dubna, Russia; ivankov@jinr.ru

\* Correspondence: kvyatkovskij@physics.msu.ru

## Calculation of hydrodynamic radius $R_h$ of for P4VP coil in good solvent

Hydrodynamic radius of P4VP coil in good solvent  $R_h$  might be evaluated, as [1]:

$$R_h = \sqrt{\frac{3\pi}{128}} 2^{2/5} L^{3/5} l_p^{2/5} = 14.2 \text{ nm},$$

where  $L=542$  nm is the averaged contour length of P4VP;  $l_p = 0.8$  nm is its persistence length, previously measured by small-angle neutron scattering in d-DMSO [2].

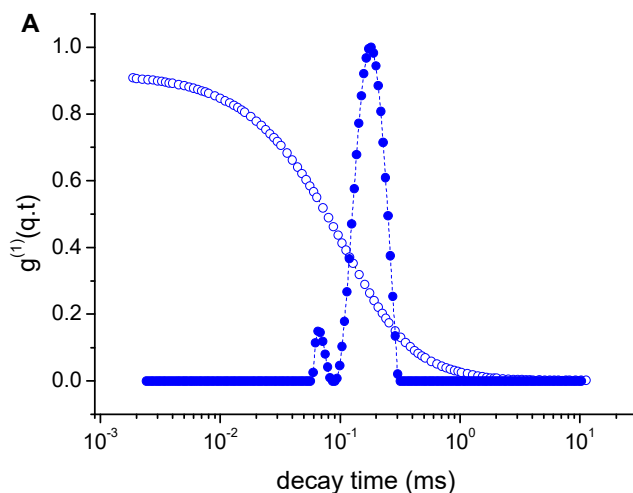

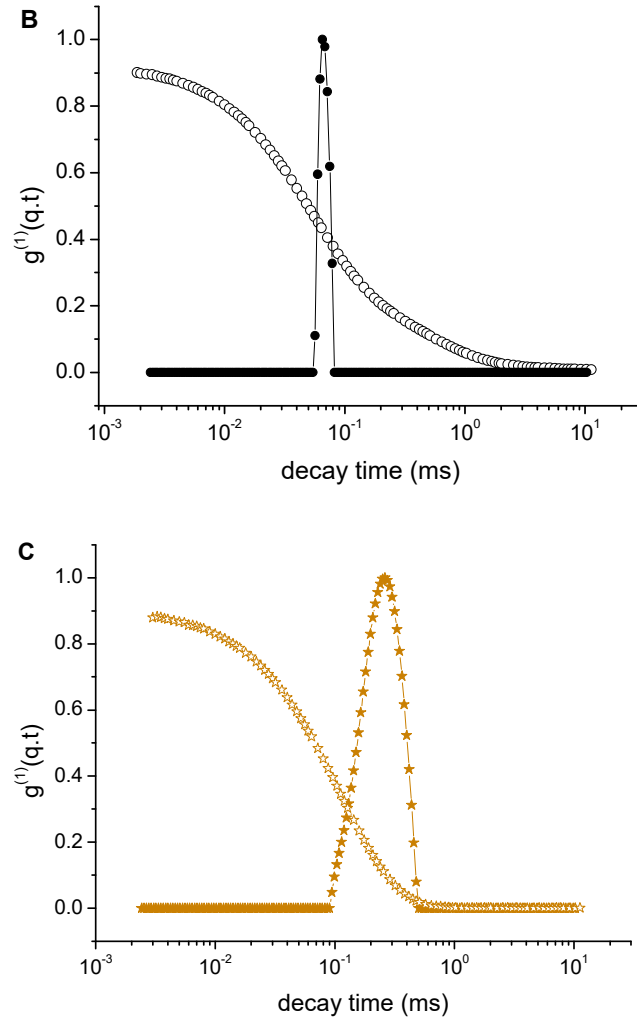

**Figure S1.** Field autocorrelation function  $g^{(1)}(q,t)$  (open symbols) and the decay time distribution function (filled symbols) at scattering angle  $\theta=90^\circ$  for solutions of beads-on-string P4VP-potassium oleate complexes with dodecane (A); microemulsion drops of dodecane without polymer (B); and P4VP in ethanol (C) at  $20^\circ\text{C}$ .

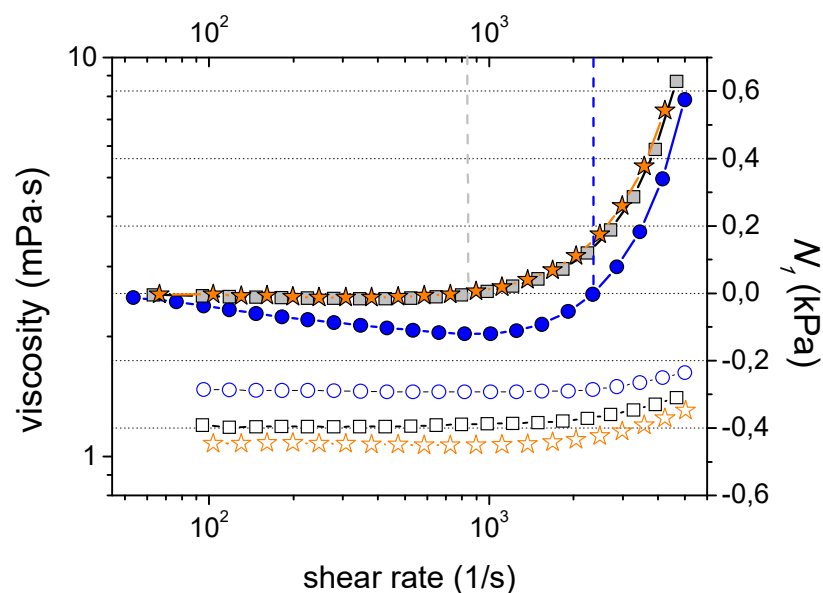

**Figure S2.** Dependences of first normal stress difference  $N_I$  (filled symbols) and apparent viscosity (empty symbols) vs shear rate of water (stars), hybrid P4VP-potassium oleate micelles without hydrocarbon (triangles), aqueous solutions of beads-on-string structures formed from hybrid P4VP-potassium oleate micelles upon addition of n-dodecane (circles) and microemulsion droplets formed from polymer-free potassium oleate micelles upon addition of n-dodecane (squares). Dashed lines point out on critical shear rates, at which turbulence is induced. Concentrations of potassium oleate, P4VP and n-dodecane are 1.5, 0.2 and 1.0 wt.%, respectively.

### References:

1. Grosberg, A.Y.; Khokhlov, A.R. *Statistical Physics of Macromolecules*; American Inst. of Physics, 1994; ISBN 978-1-56396-071-0.
2. Kwiatkowski, A.L.; Molchanov, V.S.; Sharma, H.; Kuklin, A.I.; Dormidontova, E.E.; Philippova, O.E. Growth of Wormlike Micelles of Surfactant Induced by Embedded Polymer: Role of Polymer Chain Length. *Soft Matter* **2018**, *14*, 4792–4804, doi:10.1039/C8SM00776D.
